# Supplementary material for: Acidophilic haloarchaeal strains are isolated from various solar salts
Source: PubMed Central journal article supplement (PMC2583988; doi:10.1186/1746-1448-4-16), 2008-10-29

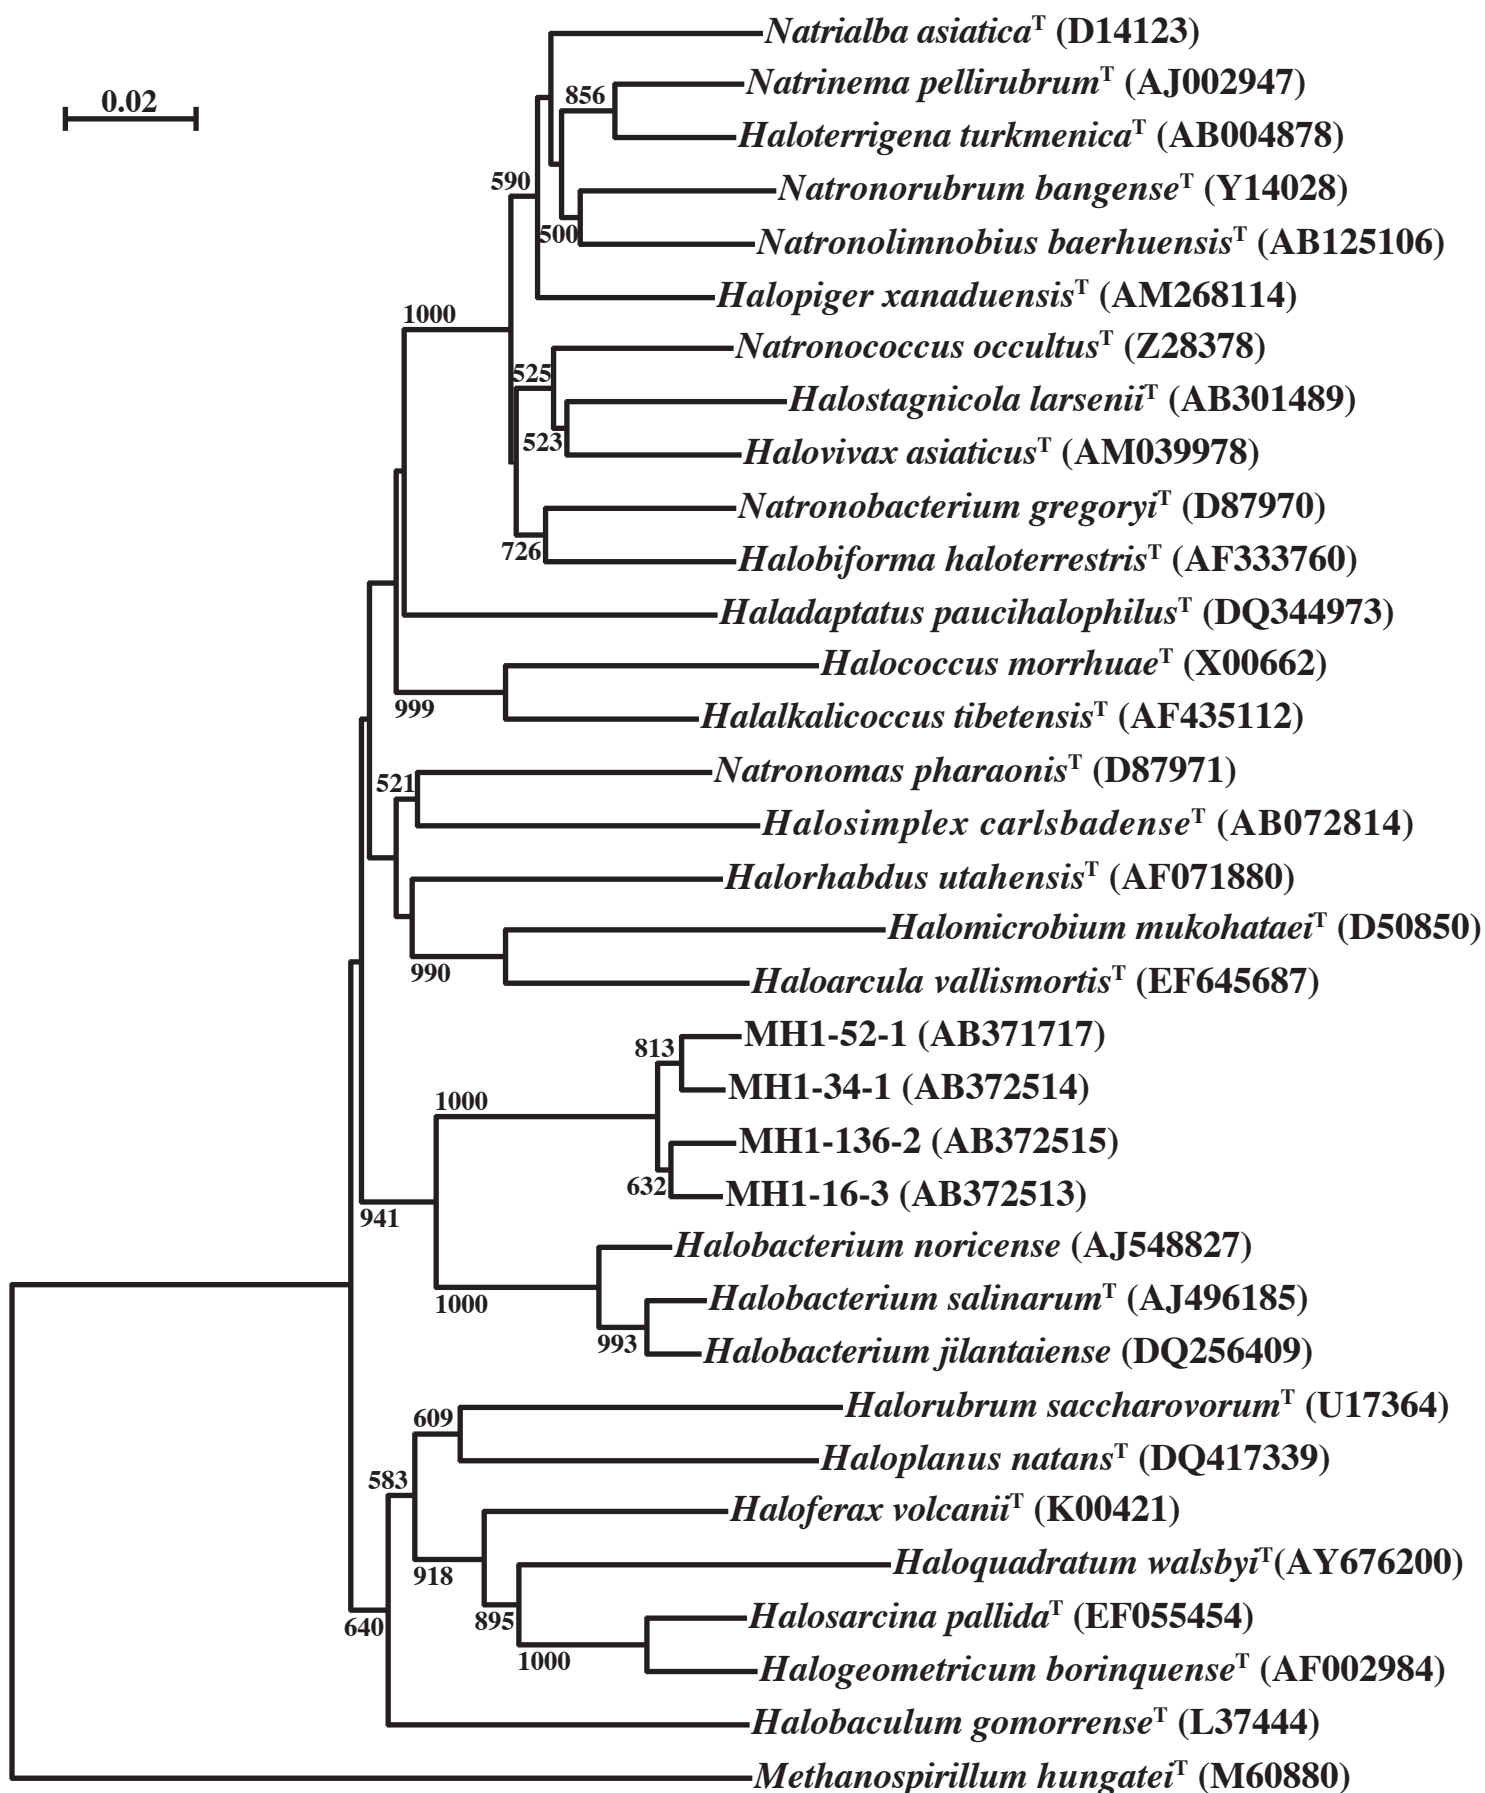

Supplement: 1746-1448-4-16-S1.pdf [file 1746-1448-4-16-S1.pdf]
